# Supplementary material
Source: PubMed Central journal article supplement (PMC6738876)
Supplement: jin-0008-0437-s01.pdf [file jin-0008-0437-s01.pdf]

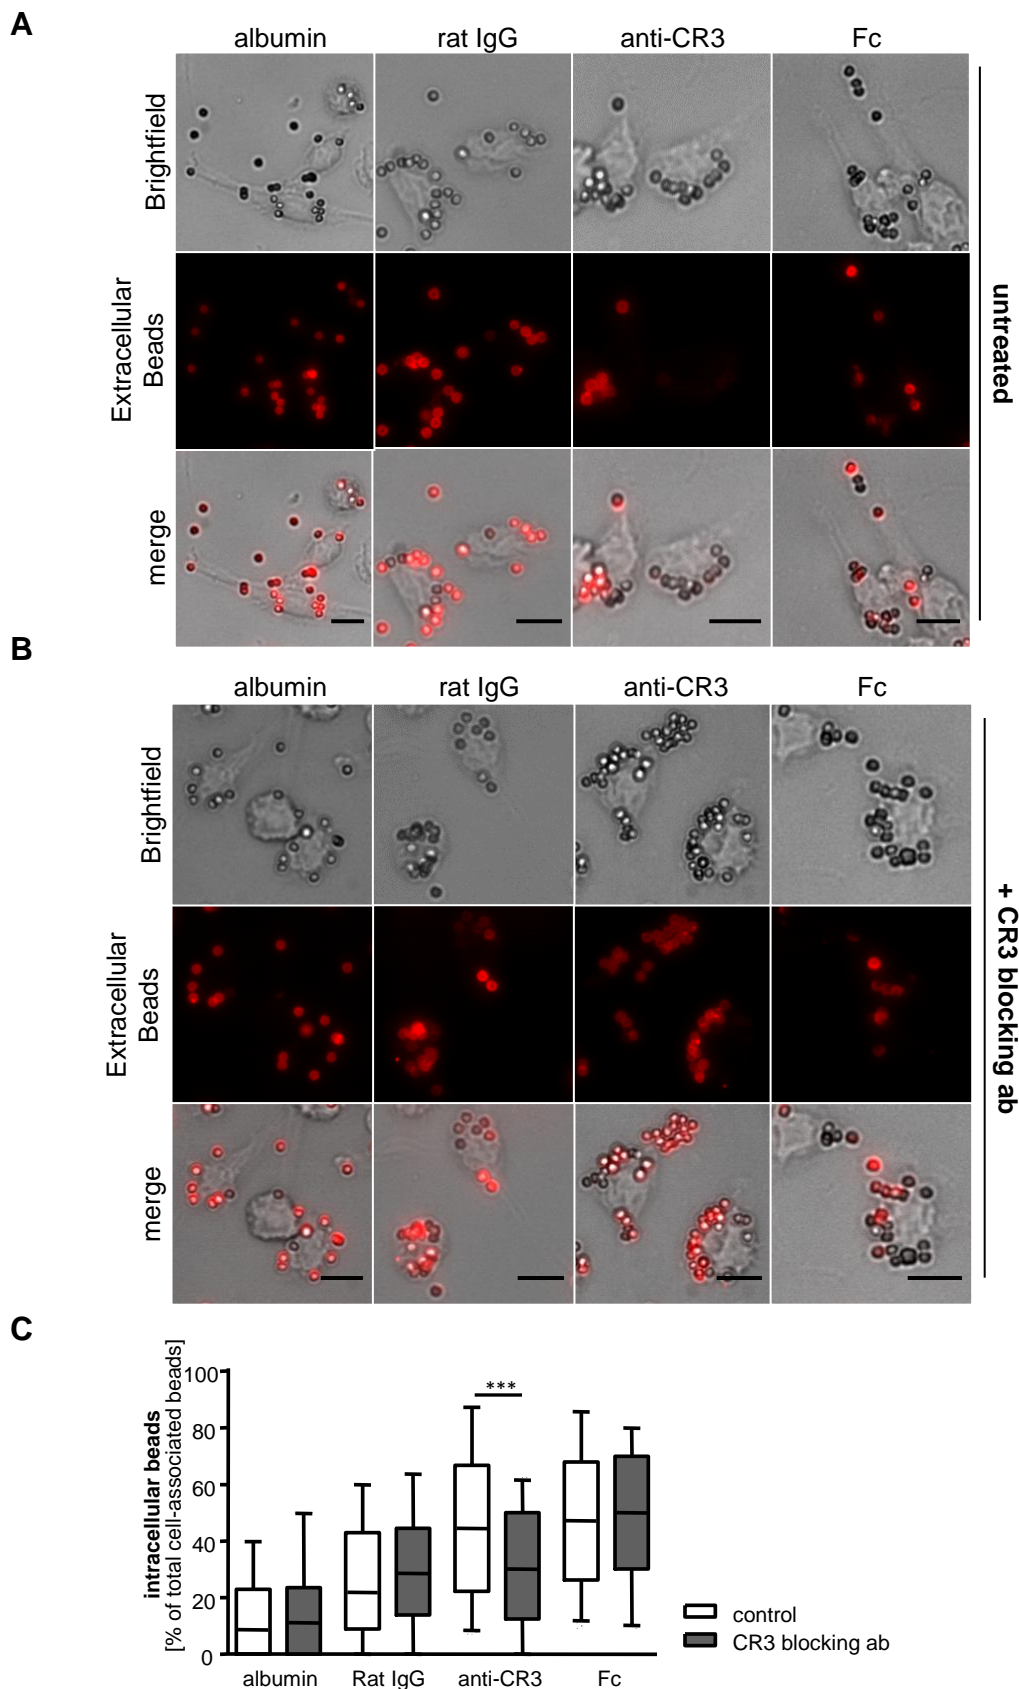

Suppl. Fig. S1. **Quantification of complement-mediated opsono-phagocytosis.** (A and B) Serum-starved Raw 264.7 macrophages were treated for 10 min with 10% hiFCS medium prior to addition of polystyrene beads. Polystyrene beads were coupled to albumin, RatIgG,  $\alpha$ -CD11b (Anti-CR3), or IgG (Fc) and biotinylated. Macrophages were incubated for 2 h in absence (A) or presence (B) of the CR3 blocking antibody ( $\alpha$ -CD11b ab), fixed and extracellular beads were stained with streptavidin-rhodamine. (C) Microscopic quantification was achieved by counting non-stained intracellular and rhodamine stained extracellular beads from (A) and (B). The line represents the median, boxes represent the 25-75 percentile, and error bars 10-90 percentile of 150 cells from three independent experiments. Groups were compared by Mann-Whitney test, \*\*\*  $p < 0.001$  (scale bars: 10  $\mu$ m).
