# Supplementary material
Source: PubMed Central journal article supplement (PMC6738876)
Supplement: jin-0008-0437-s02.pdf [file jin-0008-0437-s02.pdf]

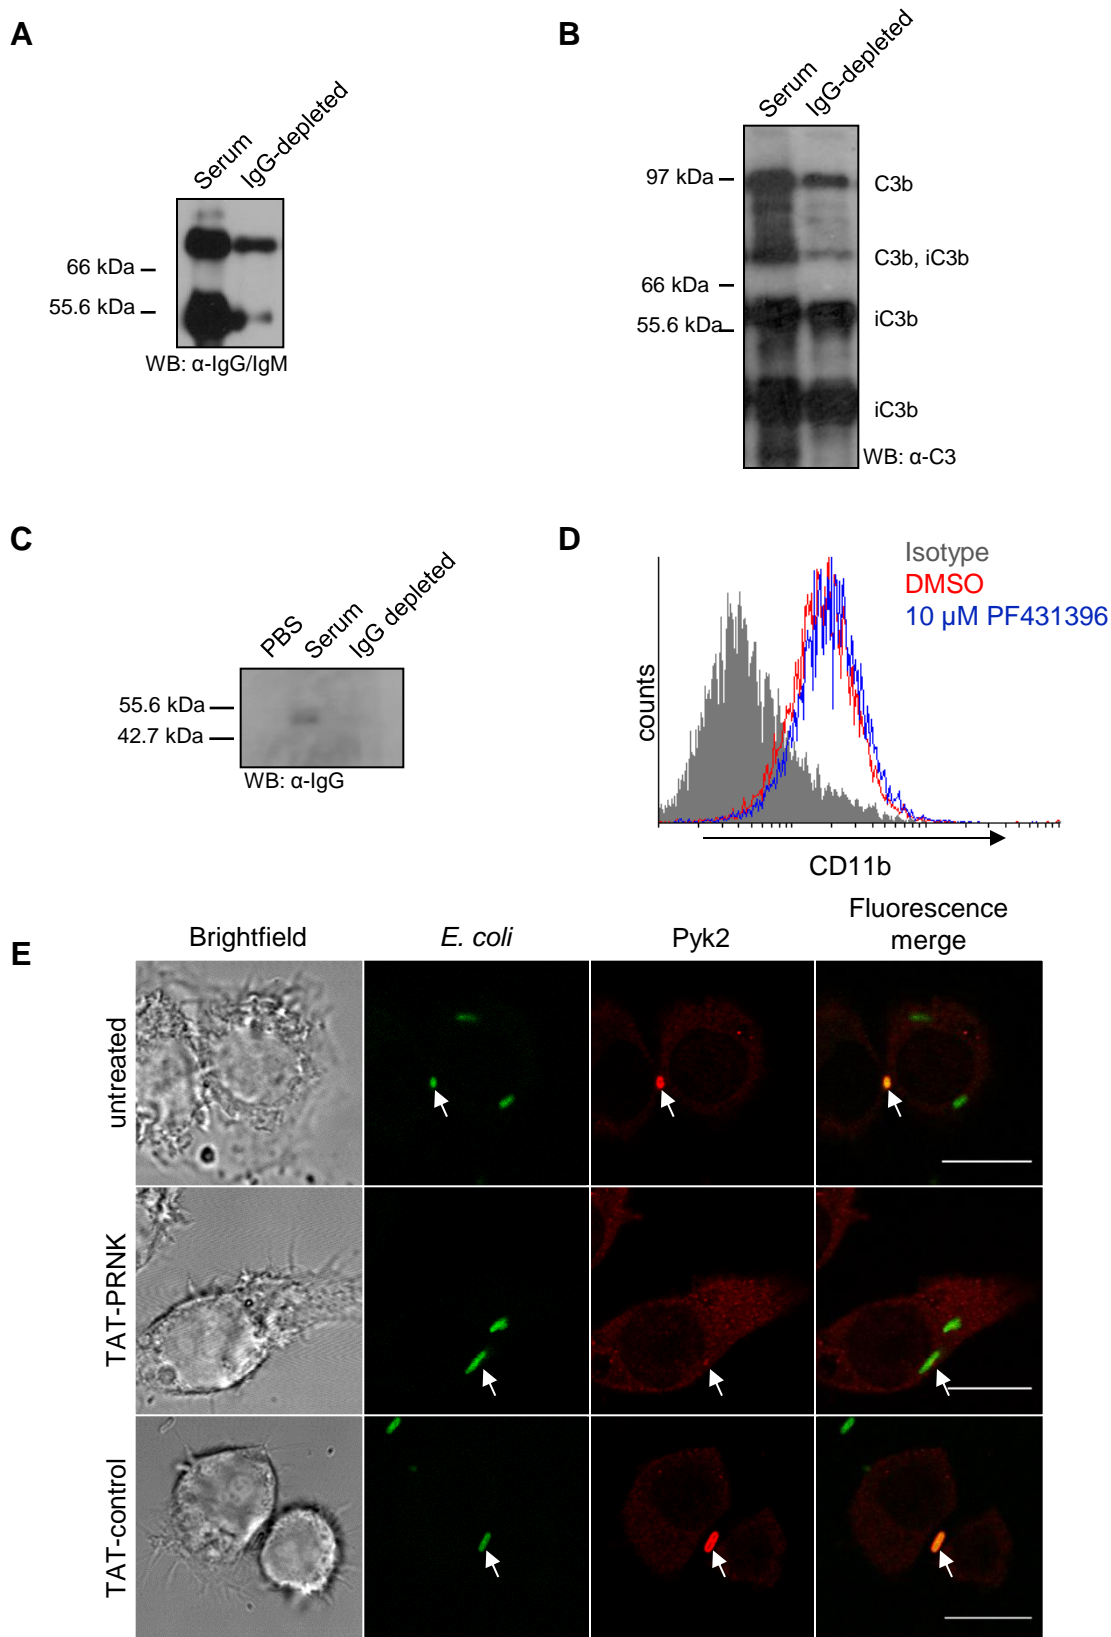

Suppl. Fig. S2. **IgG depleted serum allows selective complement opsonization of *E. coli*.** (A, B) Levels of IgG/IgM (A) and complement components (B) of untreated and IgG-depleted mouse serum were analyzed via western blotting. (C) *E. coli* were incubated with either PBS, untreated serum, or IgG-depleted serum. After opsonization, bacteria-bound IgG was analyzed by Western Blotting of the bacteria with anti-IgG antibody. (D) Serum-starved macrophages were activated with 200 ng/ml PMA and incubated in presence or absence of 10  $\mu$ M PF431396 for 1 h. Surface CD11b was stained and cells were analyzed via flow cytometry. (E) Serum-starved RAW 264.7 cells seeded on poly-L-lysine coated coverslips were incubated with 100  $\mu$ M TAT-PRNK or TAT-control protein for 30 min prior to infection with FITC-labeled *E. coli* IgG depleted serum for 60 min. Cells were fixed and stained for Pyk2. Arrows indicate Pyk2 recruitment to sites of infection, which was absent in TAT-PRNK treated cells (Scale bar: 10  $\mu$ m).
